# Supplementary material for: A Therapeutic Hepatitis B Virus DNA Vaccine Induces Specific Immune Responses in Mice and Non-Human Primates
Source: MDPI journal article supplement (doi:10.3390/vaccines9090969), 2021-08-29
Supplement: s1 [file s1]

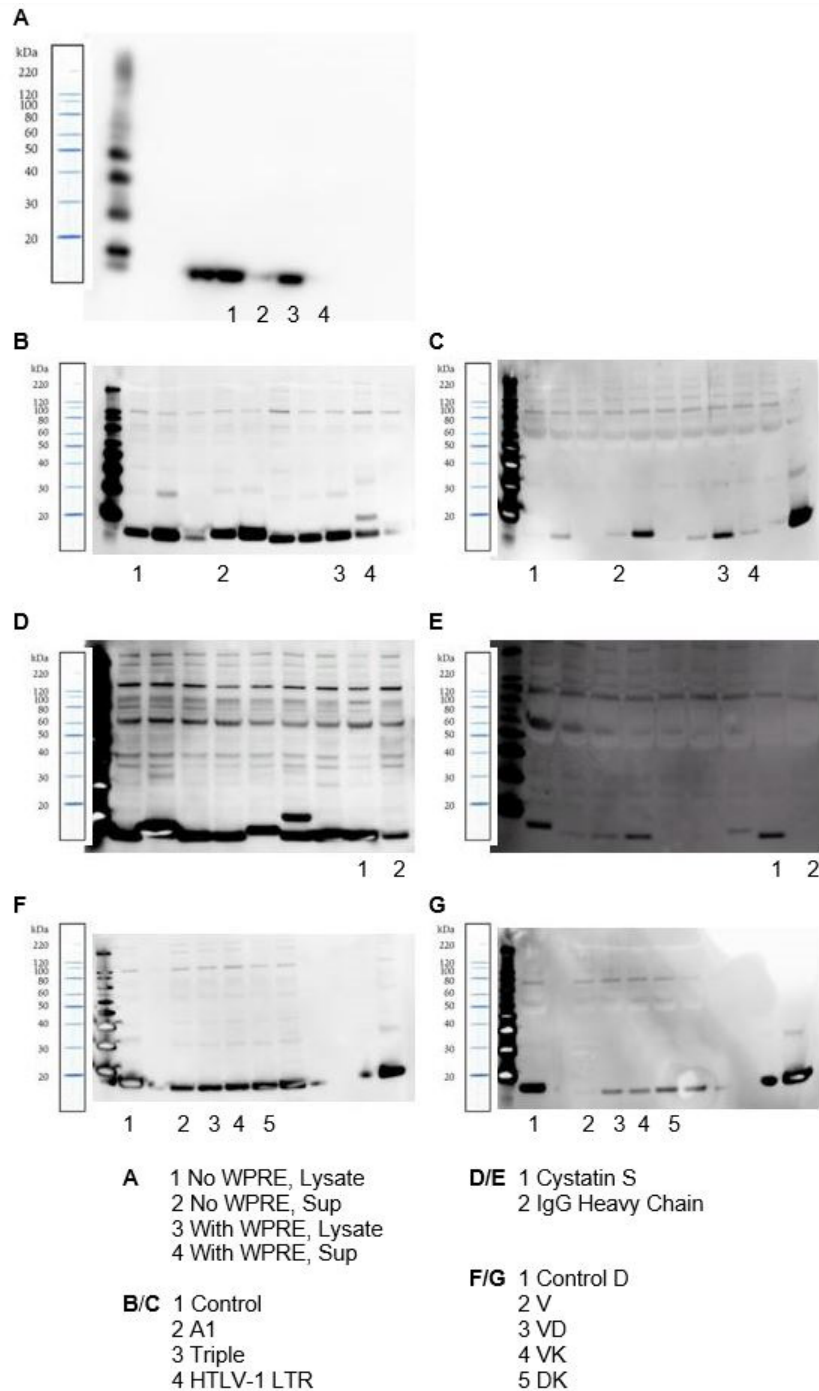

**Figure S1. Western blot detection of Core protein of HEK293T cells transfected with plasmids containing different enhancer elements, signal peptides and backbones.** (A) Influence of including Woodchuck Posttranscriptional Regulatory Element (WPRE) in Core expressing DNA plasmid. (B) and (C) Comparison of enhancer elements A1, triple enhancer and HTLV-1 LTR in lysate and supernatant, respectively. (D) and (E) Comparison of signal peptides cystatin S and IgG heavy chain in lysate and supernatant, respectively. (F) and (G) Comparison of backbones pcDNA3.1, pV, pVD, pVK and pDK in lysate and supernatant, respectively.

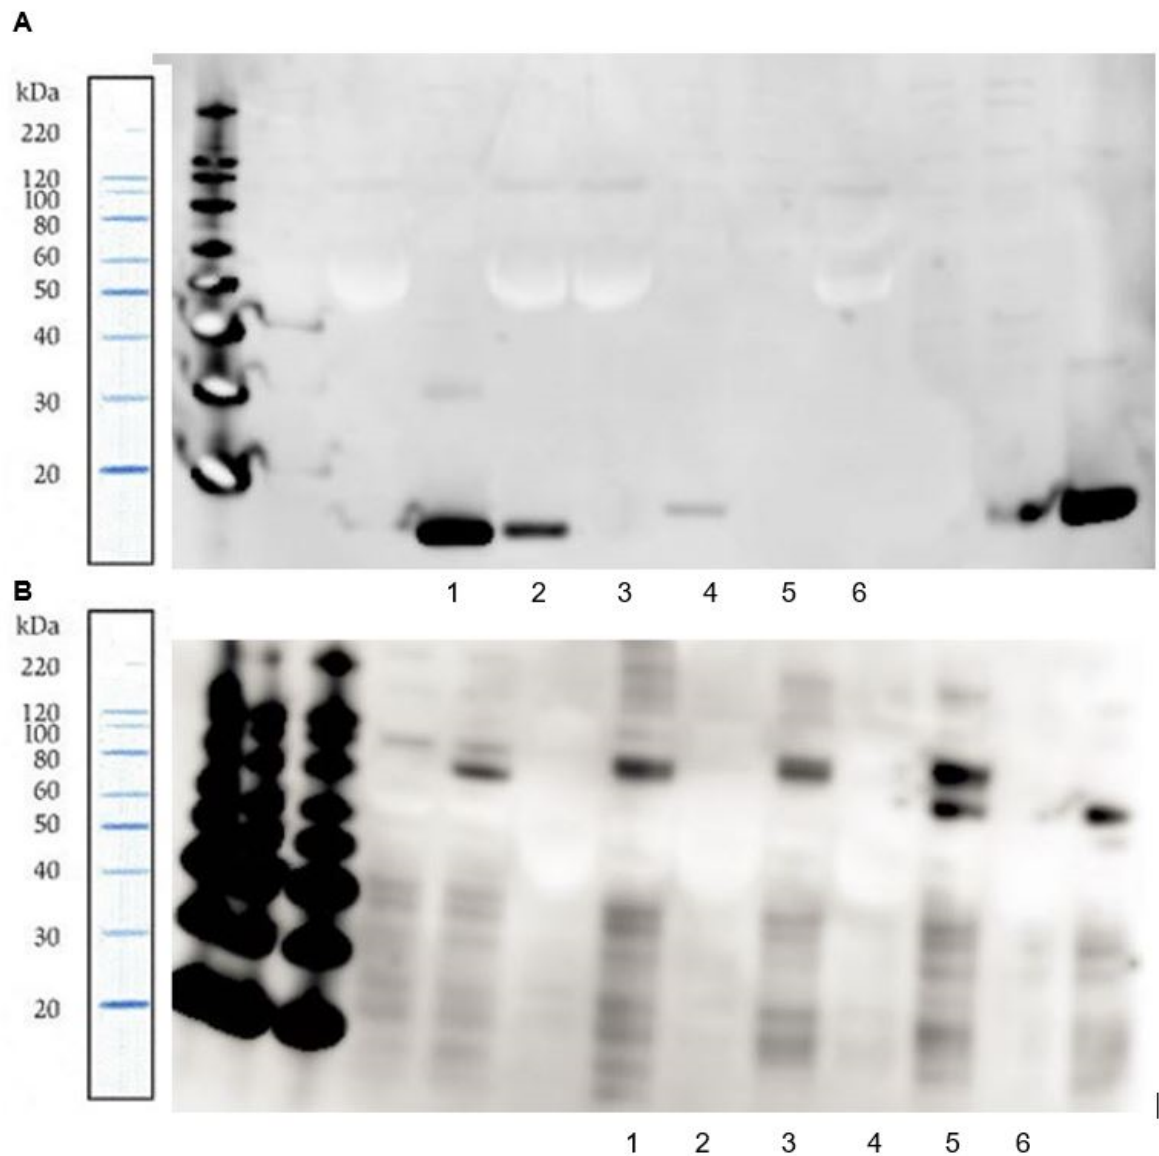

**A** 1 pDK-C, lysate – 2 pDK-C, sup – 3 pDK-CFAP, sup – 4 pDK-CFAP, lysate – 5 pDK-CP, lysate – 6 pDK-CP, sup

**B** 1 pDK-P, lysate – 2 pDK-P, sup – 3 pDK-CP, lysate – 4 pDK-CP, sup – 5 pDK-CFAP, lysate – 6 pDK-CFAP, sup

**Figure S2.** Western blot detection of Core (A) and Pol (B) protein for different DNA plasmids encoding Core and/or Pol transfected in HEK293T

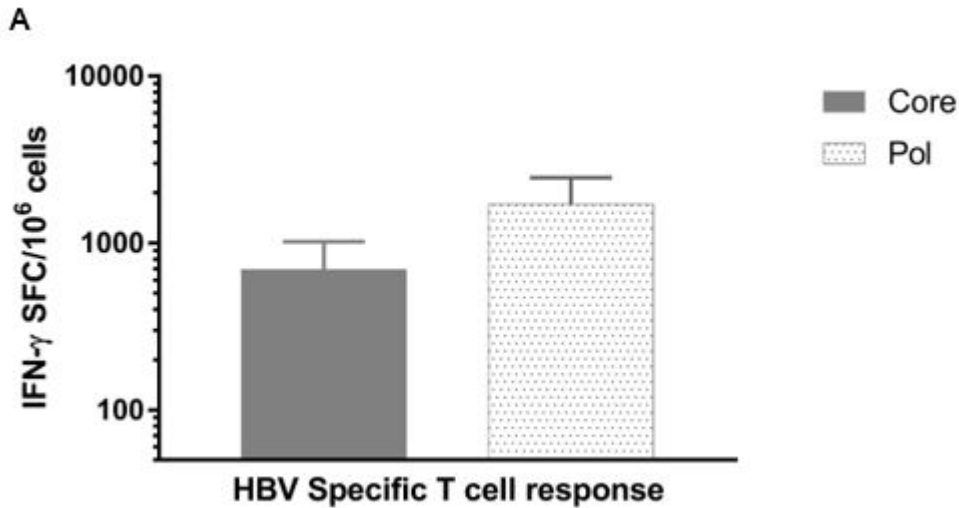

**Figure S3. Immunogenicity of Core and Pol plasmids in healthy C57BL/6 mice.** Core and Pol specific T-cell responses (number of IFN- $\gamma$ SFC)/million cells) of healthy C57BL/6 mice (n = 8 per group) vaccinated IM via electroporation with pDK-Core or pDK-Pol plasmids (10  $\mu$ g per plasmid). Dosing and sampling were performed as described in the Materials and Methods.

| ID.                  | Sequence                                  | CE    |
|----------------------|-------------------------------------------|-------|
| IgG                  | MEFGLSWVFLVAILKGVQC-EVQLLESGM- <i>DID</i> | 0.797 |
| Cystatin S precursor | MARPLCTLLLLMATLAGALA- <i>SDID</i>         | 0.930 |

**Table S1 Signal peptide sequences with indicated predicated cleavage site.** Predicted cleavage sites are indicated with a hyphen. The first three amino acids of Core are indicated in italic, CE, calculated cleavage, i.e. 1.000 = 100% cleavage
